1 **Antimicrobial susceptibility and serotype distribution of *Streptococcus agalactiae* recto-**  
2 **vaginal colonizing isolates from pregnant women at a tertiary hospital in Pretoria, South**  
3 **Africa: an observational descriptive study**

4 **Short Title: *Streptococcus agalactiae* antimicrobial susceptibilities and serotype**  
5 **distribution**

6 **Authors**

7 Mohamed Said<sup>1,2\*#</sup>, Yusuf Dangor<sup>1#</sup>, Nontombi Mbelle<sup>1,2#</sup>, Shabir A. Madhi<sup>3,4&</sup>, Gaurav  
8 Kwatra<sup>3,4&</sup>, Farzana Ismail<sup>5#</sup>

9 <sup>1</sup> University of Pretoria, Department of Medical Microbiology, Pathology Building,  
10 Prinshof Campus, 5 Bopelo Road, Pretoria, Gauteng, South Africa

11 <sup>2</sup>National Health Laboratory Service, Tshwane Academic Division, Pretoria, Gauteng,  
12 South Africa

13 <sup>3</sup>Department of Science and Technology/National Research Foundation: Vaccine  
14 Preventable Diseases, University of the Witwatersrand, Johannesburg, Gauteng, South  
15 Africa

16 <sup>4</sup>Medical Research Council: Respiratory and Meningeal Pathogens Research Unit,  
17 University of the Witwatersrand, Johannesburg, Gauteng, South Africa

18 <sup>5</sup>National Institute of Communicable Disease, TB Reference Laboratory, 1 Modderfontein  
19 Road, Sandringham, Johannesburg, Gauteng, South Africa

20 \*Corresponding author

21 E-mail: msaid@mweb.co.za

22 #These authors contributed equally to this work.

23 &These authors also contributed equally to this work.

## 24 **Abstract**

### 25 ***Introduction***

26 *Streptococcus agalactiae* or Group B Streptococcus (GBS) is a significant cause of neonatal  
27 sepsis. Intrapartum antibiotic prophylaxis is recommended for pregnant women identified  
28 to be recto-vaginally colonised between 34-37 weeks gestational age to decrease the risk of  
29 invasive disease in their newborns. The aim of this study was to investigate serotype  
30 distribution and antimicrobial susceptibility patterns of GBS isolates cultured from recto-  
31 vaginal specimens during pregnancy.

### 32 ***Methods***

33 Sixty-nine archived maternal colonizing isolates were tested against penicillin, erythromycin,  
34 clindamycin, vancomycin and levofloxacin. Minimum Inhibitory Concentration (MIC) testing  
35 was performed using the E-test method. Serotyping was performed by latex agglutination  
36 method.

### 37 ***Results***

38 The most common serotypes detected were Ia (54%), III (20%), V (16%), II (6%), IV (2%) and  
39 Ib (1%), respectively. All isolates were fully susceptible to penicillin, vancomycin and  
40 levofloxacin. Eight (11%) and 50 (56%) isolates showed intermediate resistance to  
41 erythromycin and clindamycin respectively, and one isolate was resistant to erythromycin.  
42 MLS<sub>B</sub> phenomenon was noted in 3 (4%) of the isolates.

43

44 **Conclusion**

45 GBS colonizing isolates remain susceptible to penicillin and remains the drug of choice for  
46 intrapartum antibiotic prophylaxis and treatment of invasive disease in newborns.  
47 Macrolides should only be used if clinically indicated due to the high prevalence of  
48 intermediate resistance. A hexavalent GBS vaccine currently under development would  
49 provide coverage for 100% of the isolates identified in this study.

50

51

52

53

54

55

56

57

58

59 **Keywords**

60 *Streptococcus agalactiae*

61 Antibiotics susceptibility

62 Prophylaxis

63 Serotypes

64 Vaccine

65

66

## 67 **Introduction**

68 *Streptococcus agalactiae* or Group B Streptococcus (GBS) remains a significant cause of  
69 early-onset (<7 days age; EOD) and late-onset (7-89 days age; LOD) invasive disease [1]. The  
70 incidence of EOD has declined significantly in countries where universal screening of  
71 pregnant women for GBS colonization is undertaken between 34-37 weeks of gestational  
72 age and intrapartum antibiotic prophylaxis (IAP) during labour is provided to colonized  
73 women [2].

74 Penicillin remains the drug of choice for IAP and for the treatment of GBS-EOD and LOD.  
75 Women with a history of penicillin allergy but at low risk for penicillin anaphylaxis should  
76 receive alternative treatment with a cephalosporin such as cefazolin instead of  
77 erythromycin or clindamycin [2]. This is due to an increasing resistance of GBS to  
78 clindamycin and erythromycin. Reported rates of resistance of GBS to erythromycin range  
79 from 25-32% and to clindamycin from 13-20% [2]. Vancomycin is an appropriate alternative  
80 for patients with a history of anaphylaxis to penicillin and when an isolate is resistant to  
81 clindamycin.

82 An effective GBS vaccine may prevent a broad scope of GBS associated diseases, such as  
83 GBS-EOD, GBS-LOD, spontaneous abortions, stillbirth and maternal bacteraemia [2,4]. One  
84 approach of vaccine development is to target the capsular polysaccharide (CPS) of GBS. GBS

85 serological grouping is based on the polysaccharide capsule. There are currently 10  
86 serotypes i.e. Ia, Ib and II-IX. The distribution of the five most common GBS serotypes in  
87 South Africa causing invasive disease are III-55.4%, Ia-28.2%, V-7.9%, II- 3.6% and Ib-3.4%, II-  
88 5% [5]. This compares similarly to the global distribution [6]. Seven to thirty percent of GBS  
89 isolates are serologically non-serotypeable [7].

90 The aim of this study was to determine the serotype distribution of recto-vaginal colonizing  
91 isolates from pregnant women and the antimicrobial susceptibility patterns thereof.

## 92 **Materials and methods**

### 93 **Study Design**

94 This was a laboratory based observational study examining 69 archived isolates from a study  
95 done in 2014 which investigated the prevalence of GBS colonisation in pregnant women  
96 between 26 and 37 weeks gestation [8]. In that study, 284 pregnant women were enrolled  
97 from an antenatal clinic and tested for GBS colonisation by Xpert GBS and culture. The  
98 colonisation rate was found to be 25% by culture and 24% by Xpert GBS [8]. The GBS  
99 isolates were stored in trypticase soy broth with 5% glycerol.

100 The women had been enrolled and microbiology testing done at the Tshwane Academic  
101 Division Microbiology laboratory of the National Health Laboratory Services (NHLS). The  
102 serotyping of the isolates was conducted at the Respiratory and Meningeal Pathogens  
103 Research Unit (RMPRU, Johannesburg.)

### 104 **Specimen processing**

105 The stored isolates were sub-cultured on 5% sheep blood agar and incubated for 24 hours in  
106 5% CO<sub>2</sub>. Beta-haemolytic colonies were then lawned onto Mueller Hinton agar with 5%  
107 sheep blood for Minimum Inhibitory Concentration (MIC) testing using Etest (bioMeriueux,  
108 France) strips. Five antibiotics were tested for each isolate viz. penicillin, vancomycin,  
109 erythromycin, clindamycin and levofloxacin. Plates were incubated for 24 hours in 5% CO<sub>2</sub>  
110 at 35-37°C . The MIC's were determined using the latest CLSI breakpoints (2015) and the  
111 quantitative variables obtained were classified as susceptible, non-susceptible, intermediate  
112 and resistant. The MIC's of GBS isolates which tested non-susceptible or resistant for any of  
113 the 5 antibiotics, were repeated and the results confirmed. Furthermore, two observers  
114 read the MIC values of all the isolates to minimise inter-observer variability or any form of  
115 bias.

116 As per CLSI guidelines for beta-haemolytic streptococci, MLS<sub>B</sub> testing was performed on  
117 each isolate to test for inducible clindamycin resistance. The isolates were plated on Mueller  
118 Hinton plus 5% sheep blood agar, after which erythromycin and clindamycin discs were  
119 placed next to each other, 12mm apart. The plates were incubated at 35-37°C in 5% CO<sub>2</sub> for  
120 18-24 hours. A "D-zone" on the side of the clindamycin disc facing the erythromycin disc  
121 was taken as positive for the MLS<sub>B</sub> resistance phenotype.

122 Serotyping was performed using the latex agglutination method as described by Kwatra et al  
123 [9].

124

## 125 **Ethics Approval**

126 Ethical approval for this study was obtained from the University of Pretoria Faculty of Health  
127 Sciences Research Ethics Committee. The ethics reference number is 393/2013.

128

129

130

## 131 **Results**

132 The serotype distribution of the 69 isolates were 54% Ia (n=37), 20% III (n=14), 16% V  
133 (n=11), 6% II (n=4), 3% IV (n=2) and 1% Ib (n=1).

134 The antimicrobial susceptibility testing showed 69 (100%) isolates were susceptible to  
135 penicillin (MIC range = 0.032-0.125 µg/ml). All isolates were susceptible to vancomycin with  
136 13 (18%) isolates having an MIC at the breakpoint (1µg/ml) (MIC range = 0.38-1µg/ml). Sixty  
137 (83%) isolates were sensitive to erythromycin, 8 (11%) isolates were intermediate and 1  
138 (1%) was resistant (MIC range = 0.094-3µg/ml). The erythromycin intermediate isolates  
139 belonged to serotypes Ia (3); III (2); IV (1) and V (2).

140 Thirty (42%) isolates were found to be fully susceptible to clindamycin while 40 (56%) were  
141 intermediate-susceptible and no resistant isolates were detected (MIC range = 0.19-0.75  
142 µg/ml). The clindamycin intermediate isolates belonged to serotypes Ia (23), II (1), III (8), IV  
143 (1) and V (7). Only 3 (4%; serotypes Ia, III and V) of our isolates displayed a positive MLS<sub>B</sub>  
144 phenotype. All isolates were sensitive to levofloxacin (range = 0.38-1.5 µg/ml).

145

146

147

148

149

150

151

152

153 **Table 1:** Antimicrobial susceptibility of 69 GBS isolates to 5 antimicrobial agents

| Antimicrobial agent | MIC <sub>50</sub> (µg/ml) | MIC <sub>90</sub> (µg/ml) | Range (µg/ml) |
|---------------------|---------------------------|---------------------------|---------------|
| Penicillin          | 0.047                     | 0.064                     | 0.032-0.125   |
| Erythromycin        | 0.19                      | 0.25                      | 0.094-3       |
| Clindamycin         | 0.25                      | 0.5                       | 0.19-0.75     |
| Vancomycin          | 0.75                      | 0.5                       | 0.38 -1       |
| Levofloxacin        | 0.5                       | 0.75                      | 0.38-1.5      |

154

155

156

## 157 Discussion

158 The current study characterized the antimicrobial resistance patterns in GBS isolates from  
159 pregnant women. In this study, sixty-nine (100%) isolates were fully susceptible to penicillin.

160 In a recent Chinese study looking at colonising GBS isolates from pregnant women 100% of  
161 isolates were sensitive to penicillin, ceftriaxone, linezolid and vancomycin [10]. Longtin et al.



162 described a case of GBS with reduced susceptibility to penicillin emerging after long term  
163 suppressive oral penicillin therapy for a prosthetic joint infection [11].

164 All isolates in this study were susceptible to vancomycin. There is a paucity of data on  
165 vancomycin resistance in GBS isolates, with 2 case reports. These cases involved 2 patients  
166 with invasive GBS infection with significant co-morbidities including diabetes, hypertension,  
167 congestive cardiac failure, hypercholestromaemia in 1 patient and end stage renal disease,  
168 obesity, cor-pulmonale and chronic osteomyelitis in the 2<sup>nd</sup> patient [12]. Only one of these  
169 patients had previous prolonged exposure to vancomycin. Both isolates were characterised  
170 as belonging to serotype II. The vancomycin MIC in both cases were 4ug/ml.

171 Macrolides are often regarded as alternative therapy for penicillin sensitive patients to treat  
172 GBS infections, however resistance to macrolides has increased during recent years in  
173 several countries with reported geographical variations [13]. In the Japanese study by  
174 Matsubara et al (2001) the researchers found much lower rates of resistance to  
175 erythromycin and clindamycin, 3% and 1% respectively [14]. In a Malaysian study, 23.3% of  
176 isolates were resistant to erythromycin and 17.5% to clindamycin [15]. The prevalence of  
177 resistance among invasive GBS isolates in the United States ranged from 25%-32% for  
178 erythromycin and 13%-20% for clindamycin in reports published during 2006-2009 [2]. Our  
179 data suggests a lower level of resistance to these two agents than those observed in the US  
180 and is closer to the Japanese data [2,14].

181 The CLSI recommends MLS<sub>B</sub> testing for beta-haemolytic streptococci which tests for  
182 inducible clindamycin resistance. It was found to be the main mechanism of resistance in  
183 GBS isolates isolated from the vagina as well as gastric fluid and ear specimens in a Tunisian

184 study performed by Hraoui and colleagues [13]. This phenomenon was only noted in 3  
185 (4%) of our isolates. The serotype distribution of these isolates were Ia, III and V.

186

187 All isolates in this study were susceptible to levofloxacin. However, there have been reports  
188 of fluoroquinolone resistant GBS strains that have emerged in the past decade especially in  
189 Asia, including China, Japan and Korea [16]. A study by Wu et al (2017) had confirmed that  
190 respiratory samples and elderly patients are two independent risk factors associated with  
191 levofloxacin resistance in GBS [16]. In addition the study found that levofloxacin-resistant  
192 GBS isolates belonged mainly to the ST19/serotype III serogroup [16].

193 In low income settings, safe administration of intravenous antibiotics may not always be  
194 affordable or feasible, particularly for settings where births do not occur in hospitals. In  
195 addition, IAP has not proven to be effective in preventing LOD [1]. Therefore, new strategies  
196 for prevention of GBS disease in neonates needs to be considered. Vaccination targeting  
197 pregnant women to subsequently protect neonates against GBS infection is a potential  
198 option.

199 Information regarding serotype distribution of GBS strains could guide the development of  
200 vaccine candidates. Vaccinating pregnant women against GBS may protect infants from  
201 developing invasive GBS disease. Universal screening programs for maternal GBS  
202 colonisation followed by IAP in colonised mothers have shown to decrease the incidence of  
203 EOD [2]. However, it is thought to have a minimal role in the prevention of LOD. GBS  
204 maternal vaccination has the potential to decrease EOD as well impact on LOD.

205 This study showed that serotypes Ia (54%), III (20%) and V (16%) were the predominant  
206 serotypes which is in concordance with other studies conducted among pregnant women in  
207 South Africa [5]. Serotypes Ia and III together accounted for 74% of the colonised population  
208 in our study, whilst the 3 dominant serotypes accounted for 90% of all cases. These results  
209 are in keeping with another South African study which showed that serotype III is the  
210 commonest cause of EOD in South Africa, accounting for 41.4% of all cases, whilst serotype  
211 Ia accounted for 34.7% of cases [5]. The majority of invasive disease was caused by  
212 serotypes Ia, III and V [5]. These 3 serotypes are included in a pentavalent polysaccharide  
213 protein conjugate vaccine currently being developed and is in a phase 1 trial [17].

214

215

216

217

## 218 **Conclusions**

219 GBS isolates remain susceptible to penicillin and vancomycin, however, surveillance for  
220 resistance needs to be ongoing. Macrolides should only be used once susceptibility results  
221 are available as significant rates of intermediate resistance have been detected in these  
222 isolates. Ninety percent of colonizing isolates belong to 3 serotypes, viz. Ia, III and V.

223

224

225

## 226 Acknowledgements

227 I would like to acknowledge Dr Alex Sihlabela from the Department of Obstetrics and  
228 Gynaecology at Kalafong Hospital who collected the initial swabs from pregnant women at  
229 Kalafong antenatal clinic.

230

## 231 References

232 [1] Kobayashi M, Vekemans J, Baker C, Ratner AJ, Le Doare K, Schrag SJ. Group B  
233 Streptococcus vaccine development: present status and future considerations, with  
234 emphasis on perspectives for low and middle income countries. *F1000Research*. 2016;  
235 5:2355.

236 [2] Verani JR, McGee L, Schrag SJ. Division of Bacterial Diseases, National Center for  
237 Immunization and Respiratory Diseases, Centers for Disease Control and Prevention  
238 (CDC). Prevention of perinatal group B streptococcal disease- revised guidelines from  
239 CDC 2010. *MMWR Recomm Rep*. 2010, 59:1-36.

240

241 [3] Ephraim E, Back A, Elisa J, O'Grady B, Joshua D. High Rates of Perinatal Group B  
242 Streptococcus Clindamycin and Erythromycin Resistance in an Upstate New York  
243 Hospital. *Antimicrob Agents Chemother*. 2012; 56: 739-742.

244 [4] Johri AK, Paoletti LC, Glaser P, Dua M, Sharma PK, Grandi G et al. Group B  
245 Streptococcus: global incidence and vaccine development. *Nat Rev Microbiol*. 2006. 4:  
246 932-942.

- 247 [5] Dangor Z, Cutland C, Izu A, Kwatra G, Trenor S, Lala S et al. Temporal changes in  
248 invasive Group B Streptococcus Serotypes: Implications for vaccine development. Plos  
249 one. 2016; 11 (12): e0169101.
- 250 [6] Madrid L, Seale A, Kohli-Lynch M, Edmond K, Lawn J, Heath P et al. Infant Group B  
251 Streptococcal disease incidence and serotypes worldwide: Systematic review and meta-  
252 analyses. Clinical infectious Diseases. 2017;65(S2):S160-72
- 253 [7] ] Dangor Z, Lala S, Cutland C, Koen A, Jose L, Nakwa F et al. Burden of Invasive Group  
254 B Streptococcus Disease and Early Neurological Sequelae in South African Infants. Plos  
255 One. 2015; 10 (4): e0123014.
- 256 [8] Said M, Dangor Y, Mbelle N, Sihlabela A, Lekalakala MR, Ismail F. Comparison of  
257 Xpert GBS v. culture for rapid detection of group B streptococcus in pregnant women:  
258 Sensitivity, specificity and predictive values. S Afr Med J. 2018; 108 (12): 1032-1035.
- 259 [9] Kwatra G, Adrian P, Shiri T, Buchmann E, Cutland C, Madhi S. Serotype-specific  
260 Acquisition and Loss of Group B *Streptococcus* Recto-Vaginal Colonization in Late  
261 Pregnancy. Plos One. 2014; 9 (6): e98778.
- 262 [10] Wenjing J, Zhang L, Guo Z, Xie S, Yang W, Chen J et al. Colonization prevalence and  
263 antibiotic susceptibility of Group B *Streptococcus* in pregnant women over a 6-year  
264 period in Dongguan, China. Plos One. 2017; 12 (8): e018083.
- 265 [11] Longtin J, Vermeiren C, Shahinas D, Tamber GS, McGeer A, Low DE et al. Novel  
266 mutations in a patient isolate of *Streptococcus agalactiae* with reduced penicillin  
267 susceptibility emerging after long term oral suppressive therapy. Antimicrob Agents  
268 Chemother. 2011; 55(6): 2983-2985.

- 269 [12] Park C, Nichols M, Schrag S. Two cases of invasive vancomycin resistant group B  
270 streptococcus infection. N Engl J Med. 2014, 370;9 (Correspondence).
- 271 [13] Hraoui M, Boutiba-Ben Boubaker I, Rachdi M, Slim A, Ben Redjeb S. Macrolide and  
272 tetracycline resistance in clinical strains of *Streptococcus agalactiae* isolated in Tunisia. J  
273 Med Microbiol. 2012, 61: 1109-1113.
- 274
- 275 [14] Matsubara K, Nishiyama Y, Katayama K, Yamamoto G, Sugiyama M, Murai T et al.  
276 Change of antimicrobial susceptibility of group B streptococci over 15 years in Japan. J  
277 Antimicrob Chemother. 2001, 48: 579-582.
- 278 [15] Eskandarian N, Ismail Z, Neela V, van Belkum A, Desa M, Nordin S. Antimicrobial  
279 susceptibility profiles, serotype distribution and virulence determinants among invasive,  
280 non-invasive and colonising *Streptococcus agalactiae* (group B streptococcus) from  
281 Malaysian patients. Eur J Clin Microbiol Infect Dis. 2015; 34: 579-584.
- 282
- 283 [16] Wu C, Lai J-F, Huang I-W, Hsiah L-Y, Wang H-Y, Shiao Y-R et al. Multiclonal  
284 emergence of levofloxacin-resistant group B *Streptococcus*, Taiwan. J Antimicrob  
285 Chemother. 2017; 72: 3263-3271.
- 286
- 287 [17] Lin SM, Zhi Y, Ahn KB, Lim S, Seo HS. Status of group B streptococcal vaccine  
288 development. Clin Exp Vaccine Res. 2018; 7:76-81
- 289
- 290

291

292

293

294

295

296

297

298
